# Supplementary material
Source: HighWire-hosted journal article supplement (https://diabetes.diabetesjournals.org/content/suppl/2007/12/28/db07-0698)
Supplement: db070698SupplementalTable.pdf [file db070698SupplementalTable.pdf]

Supplemental table 1. Primer pairs for real-time PCR

| Gene            | Forward                  | Reverse                  |
|-----------------|--------------------------|--------------------------|
| <i>Ppargc1a</i> | aattctcccttgatgtgaga     | gctcttgccggtattcatccc    |
| <i>Ppargc1b</i> | ccgtgtggtatacattcgaa     | tttacttctcgtcagcacc      |
| <i>Eif4ebp1</i> | ctgatggagtgtcggaactca    | aggtatgtgctgggttcaca     |
| <i>Ucp1</i>     | tacagagttagaccaccaca     | cacaacatgatgacgttcca     |
| <i>Ucp2</i>     | aagatactctcctgaaagcca    | cgagattgtaggcagccatt     |
| <i>Adrb3</i>    | tgctgttccttgccccaac      | gaagatgccataatgagacc     |
| <i>Fasn</i>     | actctgaggacaccgtgacca    | ggcctcaggatagaggtgct     |
| <i>Adipoq</i>   | tatgacggcagcactggcaag    | tcagttggtatcatgtagag     |
| <i>Slc2a4</i>   | aggcatcaatgctgtttcta     | gtactgggttcacctcctgc     |
| <i>Pparγ</i>    | ccctgatgaataaagatgga     | gaggctgtcatcttctgga      |
| <i>Lep</i>      | tcaatgacattcacacacgc     | ttgaaactcagcattcagg      |
| <i>Retn</i>     | atccacctcgtactacacc      | ctacaagcgtttaggtgcc      |
| <i>Tnf</i>      | gatgaagaaccttctattcc     | acatcaggaagcgacctgcag    |
| <i>Actin</i>    | ctggagaagagctatgagctgcct | ctcctgctgctgatccacatctg  |
| <i>Cdkn1b</i>   | ttccgcctgcagaaatctctt    | ttacgtctggcgtcgaaggcc    |
| <i>Rb1</i>      | ccagatggtgtgtaatagtga    | tcaccacacacaaatattcagc   |
| <i>Rbl2</i>     | agccatcagaattctccaaccg   | caaatggatagggagagaggg    |
| <i>Cdkn1a</i>   | atgtccaatcctggtgatgtc    | tcagggttttctcttcagaa     |
| <i>Ccng2</i>    | ctttactggaggggaactgg     | atgtctcaccagagctctca     |
| <i>Sod2</i>     | agaagtaccacgaggctctgg    | gcaatctgtaagcgaccttgct   |
| <i>Cat</i>      | gcgctgtagatgtgaaacgct    | aggcttctcagcgttgactt     |
| <i>Gadd45a</i>  | agaccccgataacgtgtgact    | tgatccatgtagcgactttcc    |
| <i>Bcl2l11</i>  | atggccaagcaaccttctgat    | tcagttgtaccaggcatcacc    |
| <i>Cox5b</i>    | gctgcatctgtgaagaggacaac  | cagcttgaatgggtccacagt    |
| <i>CoxIII</i>   | gcaggattctctgagcgttct    | gtcagcagcctcctagatcatgt  |
| <i>Cox8b</i>    | gaacatgaagccaacgact      | gcgaagttcacagtgggtcc     |
| <i>Cox4il</i>   | accaagcgaatgctggacat     | ggcggagaagccctgaa        |
| <i>Cyc</i>      | gcaagcataagactggacaaa    | ttgttggcatctgtgaagagaatc |
