# Supplementary material
Source: HighWire-hosted journal article supplement (https://diabetes.diabetesjournals.org/content/suppl/2007/12/28/db07-0698)

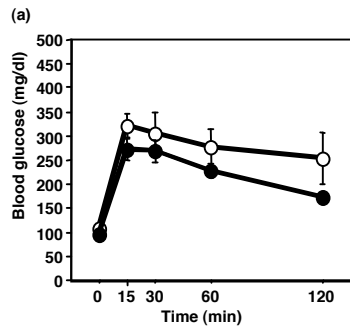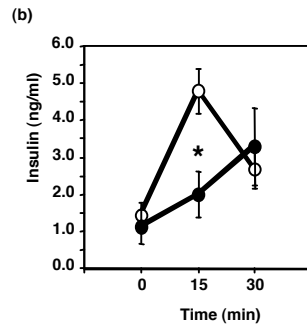

(a)

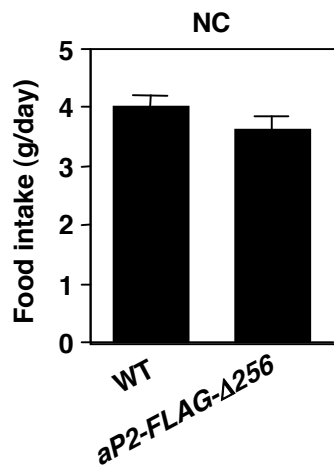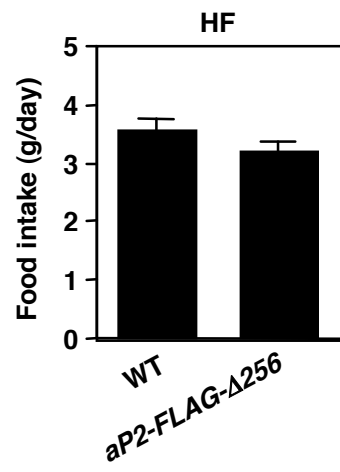

(b)

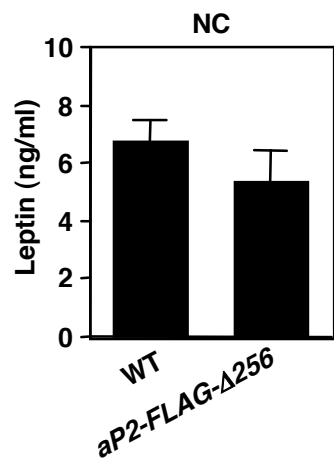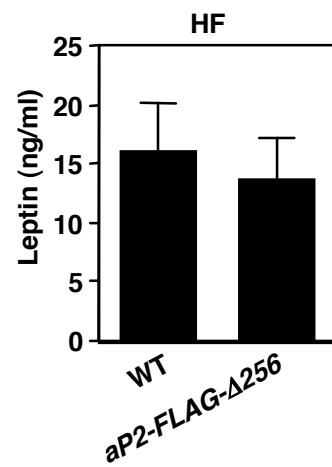

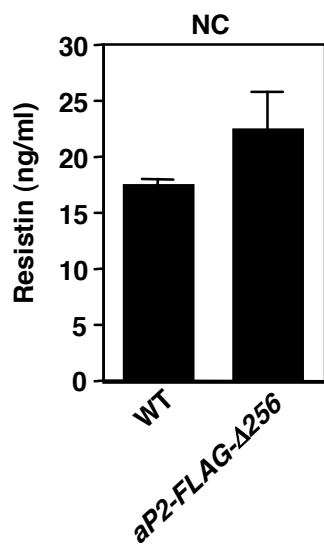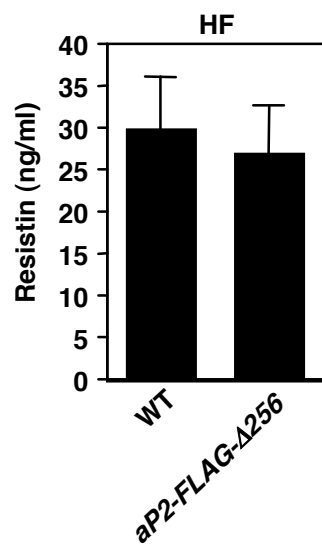

Supplement: db070698SupplementalFigures.pdf [file db070698SupplementalFigures.pdf]
